# Supplementary material for: Association between Neutrophil Percentage-to-Albumin Ratio and All-Cause Mortality in Critically Ill Patients with Coronary Artery Disease
Source: Biomed Res Int. 2020 Aug 31;2020:8137576. doi: 10.1155/2020/8137576 (PMC7479485; doi:10.1155/2020/8137576)
Supplement: Supplementary Materials — 1. The file named “Original data” was the raw data for all the analysis of this article. 2. The file named “selected population icd9-code” was used to show all icd9_code related to the diagnosis of coronary artery disease. [file 8137576.f1.zip]

Archive with 2 entries (2 files):
- Original Data.dta
- selected population icd9-code.docx
